# Supplementary material
Source: publisher figshare collection journal article supplement (https://sage.figshare.com/ndownloader/files/15551165)
Supplement: Supplementary file 1 [file 15551165]

## Online Appendix

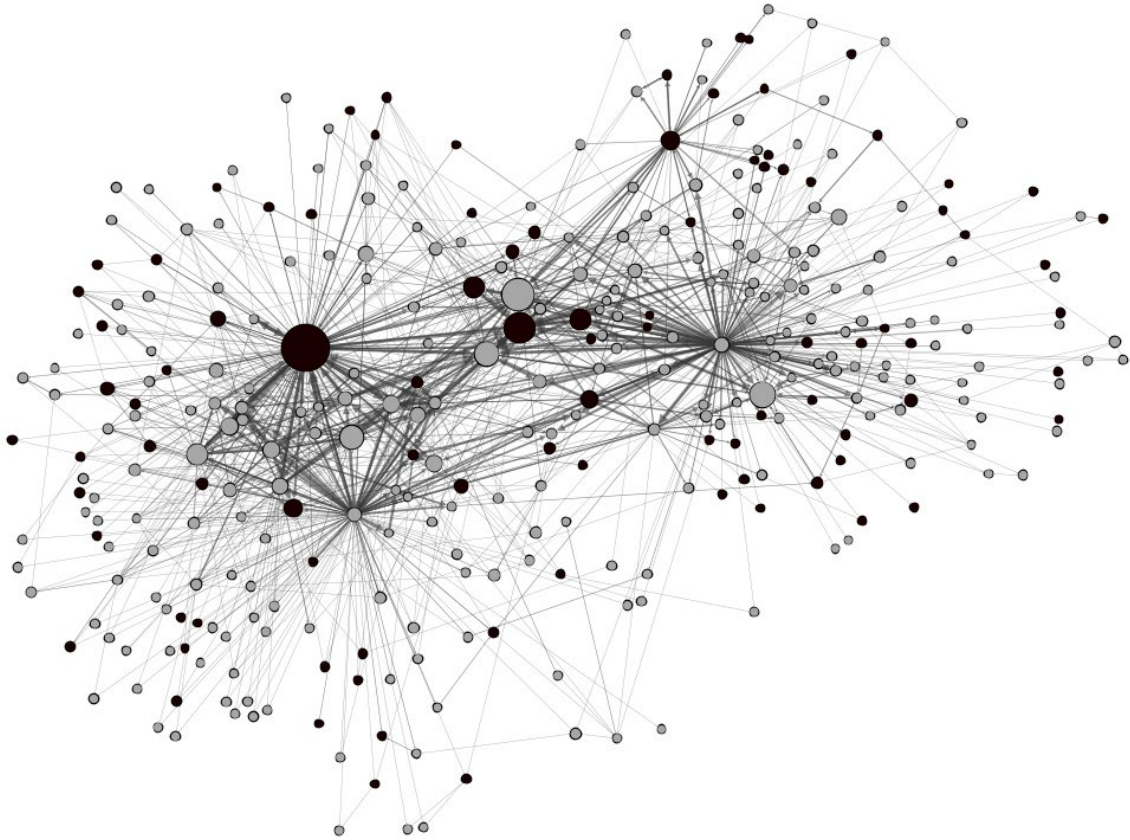

*Figure 1.* Stacked hyperlink network of climate advocate and climate skeptical coalitions of the German crawls. Node size is proportional to indegree, edge size is proportional to weight. Colors: grey = climate advocate, black = climate skeptic. Basis: 242 advocates, 93 skeptics.

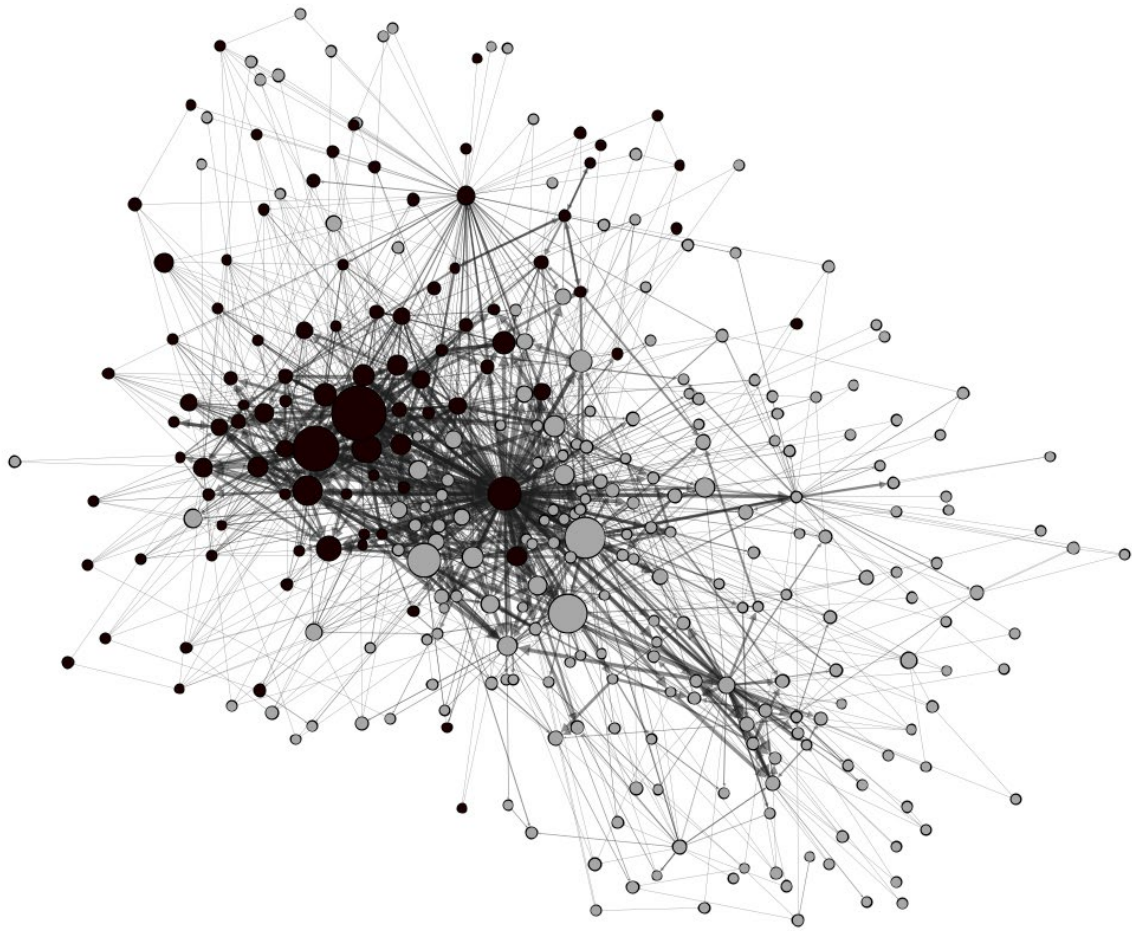

*Figure 2.* Stacked hyperlink network of climate advocate and climate skeptical coalitions of the UK crawls. Node size is proportional to indegree, edge size is proportional to weight. Colors: grey = climate advocate, black = climate skeptic. Basis: 218 advocates, 94 skeptics.

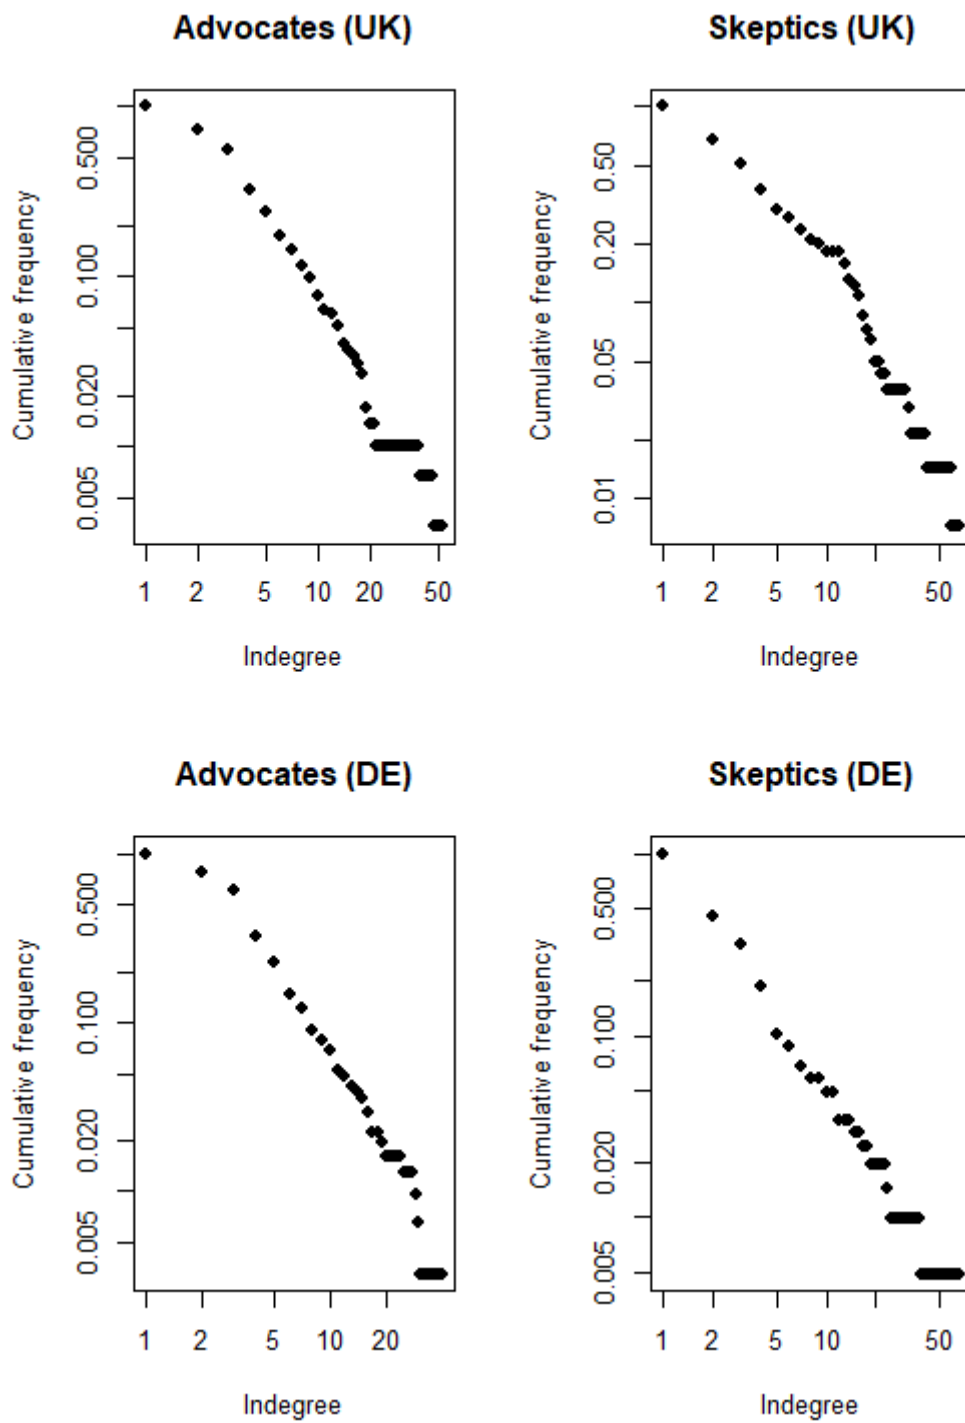

*Figure 3.* Cumulative indegree distribution of climate advocates and climate sceptics in the UK and the German network.

*Note.* Axes are on a log-log scale. Basis UK network: 218 advocates, 94 skeptics. Basis German network: 242 advocates, 93 skeptics.
